# Supplementary material
Source: bioRxiv or medRxiv preprint supplement (https://medrxiv.org/highwire/filestream/85647/field_highwire_adjunct_files/1/2020.06.11.20128686-2.pdf)
Supplement: Supplementary file [file 2020.06.11.20128686-2.pdf]

Table S2: IFT and NT results in PCR confirmed, symptomatic and asymptomatic individuals, Heinsberg District, Germany, April 2020 (n=42)

|                                        | Complete cohort |         | PCR confirmed cases |         | PCR negative or not tested |         |             |         |
|----------------------------------------|-----------------|---------|---------------------|---------|----------------------------|---------|-------------|---------|
|                                        |                 |         |                     |         | Asymptomatic               |         | Symptomatic |         |
| Number of individuals n, (%)           | 42              | (100%)  | 8                   | (19.0%) | 15                         | (35.7%) | 19          | (45.2%) |
| <b>IFT (n=42) n (%)</b>                |                 |         |                     |         |                            |         |             |         |
| Positive                               | 23              | (54.8%) | 8                   | (100%)  | 3                          | (20.0%) | 12          | (63.2%) |
| Negative                               | 19              | (45.2%) | 0                   | (0%)    | 12                         | (80.0%) | 7           | (36.8%) |
| <b>Neutralisation assay (n=42)</b>     |                 |         |                     |         |                            |         |             |         |
| Positive $\geq 20$ , n (%), (NT range) | 26              | (61.9%) | 8                   | (100%)  | 5                          | (33.3%) | 13          | (68.4%) |
|                                        | (20-10,240)     |         | (40-10,240)         |         | (20-2,560)                 |         | (20-40)     |         |
| Negative $< 20$ , n (%)                | 16              | (38.1%) | 0                   | (0.0%)  | 10                         | (66.6%) | 6           | (31.6%) |
